# Supplementary material
Source: MDPI journal article supplement (https://www.mdpi.com/2073-4360/7/11/1521)
Supplement: s1 [file s1]

# Supplementary Materials: Epirubicin-Complexed Polypeptide Micelle Effectively and Safely Treats Hepatocellular Carcinoma

Qinglin Zhang, Jianxun Ding, Chenwei Lv, Weiguo Xu, Xun Sun and Xiangwei Meng

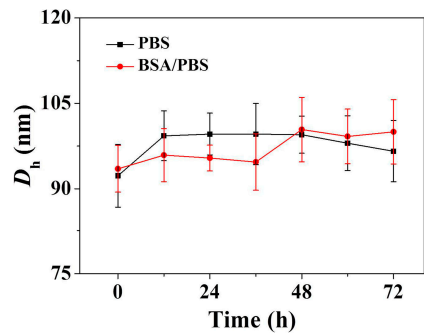

**Figure S1.**  $D_h$  changes of mPEG-*b*-PGA/EPI in PBS and BSA/PBS of pH 7.4 at 25 °C *versus* time. Data were presented as mean  $\pm$  standard deviation ( $n = 3$ ).

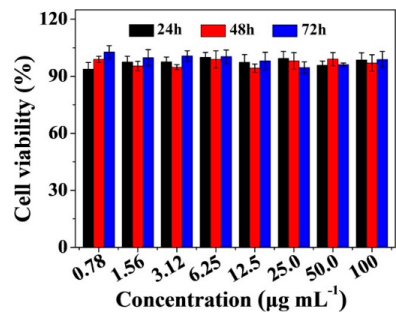

**Figure S2.** *In vitro* cytotoxicity of mPEG-*b*-PGA toward HepG2 cells after incubation for 72 h.

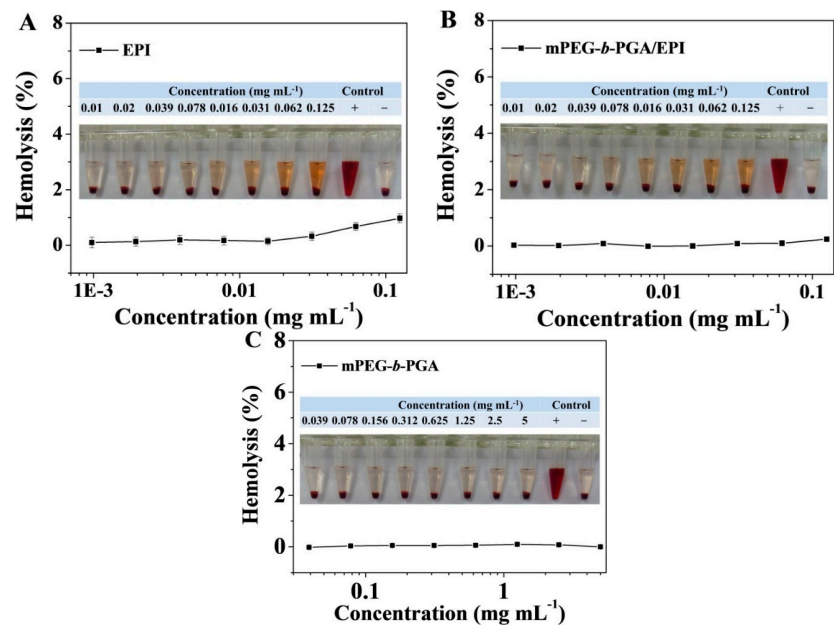

**Figure S3.** Hemolysis of free EPI (A), mPEG-*b*-PGA/EPI (B), and mPEG-*b*-PGA (C).

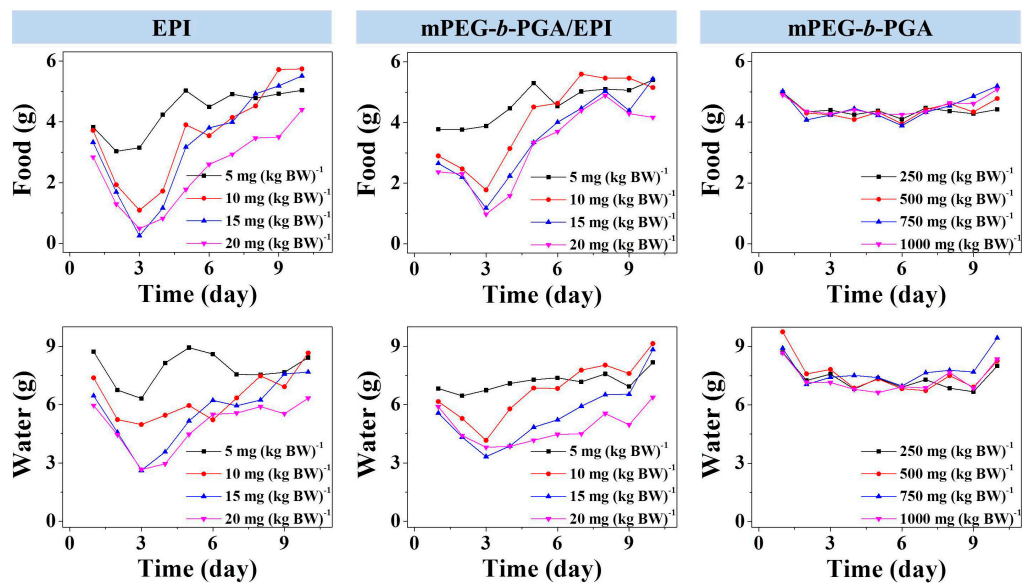

**Figure S4.** Diet amounts (e.g., food and water intake amount) of Kunming mice after intravenous injection of free EPI or mPEG-*b*-PGA/EPI at EPI equivalent dose of 5.0, 10.0, 15.0, or 20.0 mg·(kg BW)<sup>-1</sup>, or mPEG-*b*-PGA at dose of 250.0, 500.0, 750.0, or 1000.0 mg·(kg BW)<sup>-1</sup>.

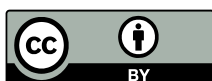

© 2015 by the authors; licensee MDPI, Basel, Switzerland. This article is an open access article distributed under the terms and conditions of the Creative Commons by Attribution (CC-BY) license (<http://creativecommons.org/licenses/by/4.0/>).
